# Supplementary material
Source: PubMed Central journal article supplement (PMC5625043)
Supplement: 10.1074_M117.803973_jbc.M117.803973-1.pdf [file 10.1074_M117.803973_jbc.M117.803973-1.pdf]

Table S1: List of primers used in this study

| Gene            | Forward Primer (5'-3')  | Reverse Primer (3'-5')    |
|-----------------|-------------------------|---------------------------|
| <i>Rpl19</i>    | AGCCTGTGACTGTCCATTCC    | GGCAGTACCCTTCCTCTTCC      |
| <i>G6pc</i>     | TCCTGGGACAGACACACAAG    | CAACTTTAATATACGCTATTGG    |
| <i>Pck1</i>     | AGATGGCAAGTTCCTCTGGC    | TGTCTTCCCCTTCAATCCGC      |
| <i>Dgat2</i>    | AGTGGCAATGCTATCATCATCGT | AAGGAATAAGTGGGAACCCAGATCA |
| <i>Lpin1</i>    | TGACTCGTTTCAGACGGA      | GGCTTTCCATTCTCGCAGCTCCT   |
| <i>Agpat2</i>   | GCAACGACAATGGGGACCTG    | ACAGCATCCAGCACTTGTACC     |
| <i>Cd36</i>     | CCTCCAGAATCCAGACAACC    | CACAGGCTTTCCTTCTTTGC      |
| <i>Fasn</i>     | GGCATCATTGGGCACTCCTT    | GCTGCAAGCACAGCCTCTCT      |
| <i>Mlxipl</i>   | CGACACTCACCCACCTCTTC    | TTGTTCAAGCCGGATCTTGTC     |
| <i>Srebf1</i>   | TGACCCTACGAAGTGCACAC    | CATGCCCTCCATAGACACATC     |
| <i>Dio2</i>     | CCACCTGACCACCTTTCCT     | TGGTTCCGGTGCTTCTTAAC      |
| <i>Cidea</i>    | GCCTGCAGGAACTTATCAGC    | CCATTTCTGTCCCTTTTCCA      |
| <i>Ucp1</i>     | GCCTTCAGATCCAAGGTGAA    | TAAGCCGGCTGAGATCTTGT      |
| <i>Ppargc1a</i> | ATGTGTCGCCTTCTTGCTCT    | ATCTACTGCCTGGGGACCTT      |
| <i>Prdm16</i>   | GCCATTCATATGCGAGGTCT    | CCAGGCGTGTAATGGTTCTT      |
| <i>Ebf2</i>     | GGGATTCAAGATACGCTAGGAAG | GGAGGTTGCTTTCAAATGGG      |
